# Supplementary material
Source: Springer Nature journal article supplement (https://www.springermedizin.de/resource/supplementary/12879_2009_1168_MOESM2_ESM.pdf/9442000)
Supplement: MOESM2 [file 9442000]

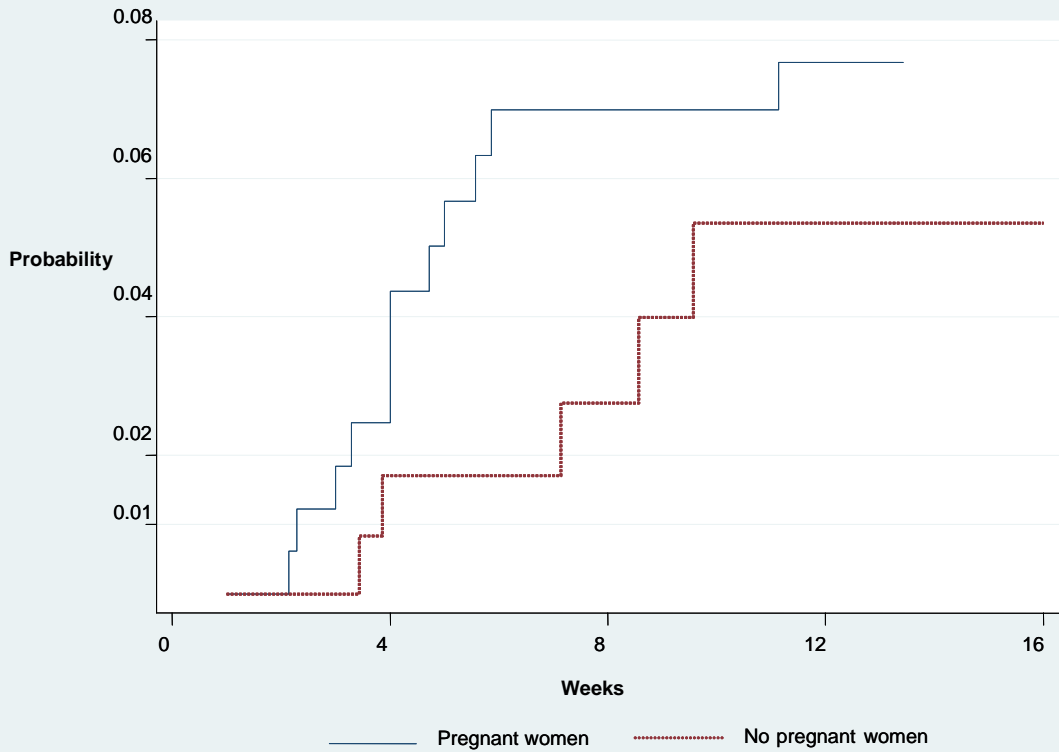

**P=0.36**

|                                   | HAART in non pregnant women |                | HAART in pregnant women |                |
|-----------------------------------|-----------------------------|----------------|-------------------------|----------------|
| Time of occurrence of SAEs        | Day 30                      | Day 90         | Day 30                  | Day 90         |
| Probability of occurrence of SAEs | 4.9 (2.5-9.6)               | 7.5 (4.3-12.7) | 2.5 (0.8-7.5)           | 5.3 (2.1-12.2) |
| No. of patients at risk           | 154                         | 144            | 118                     | 60             |

SAEs: severe adverse events

CI: confidence interval

HAART: Highly active antiretroviral therapy
